# Supplementary material
Source: PubMed Central journal article supplement (PMC9530122)
Supplement: 41419_2022_5250_MOESM2_ESM.pdf [file 41419_2022_5250_MOESM2_ESM.pdf]

Please complete the table below to indicate the contributions of all named authors to the figures.

Figure 1:

Gonzalo Manuel Sánchez designed the figure.  
Karin E. Giacomuzzi edited the final version.  
All contributing authors revised the figure.

Figure 2:

Gonzalo Manuel Sánchez designed the figure.  
Karin E. Giacomuzzi edited the final version.  
All contributing authors revised the figure.

Figure 3:

Gonzalo Manuel Sánchez designed the figure.  
Karin E. Giacomuzzi edited the final version.  
All contributing authors revised the figure.

Figure 4:

Figure 5:

Figure 6:

Signed for and on behalf of the Author(s):



Print Name:

Matías Blaustein

Date:

September 6th, 2022
